# Supplementary material for: Supramolecular nanomedicine for selective cancer therapy via sequential responsiveness to reactive oxygen species and glutathione
Source: Royal Society of Chemistry journal article supplement (doi:10.1039/d0bm01802c), 2020-12-10
Supplement: d0bm01802c1.pdf [file d0bm01802c1.pdf]

## Supporting Information

### **Supramolecular Nanomedicine for Selective Cancer Therapy via Sequential Responsiveness to Reactive Oxygen Species and Glutathione**

Chen Sun,<sup>a†</sup> Zeyu Wang,<sup>a†</sup> Ziyi Wang,<sup>a†</sup> Ludan Yue,<sup>a</sup> Qian Cheng,<sup>a</sup> Zhan Ye,<sup>b</sup> Qing-Wen Zhang,<sup>a\*</sup> and Ruibing Wang<sup>a\*</sup>

<sup>a</sup>State Key Laboratory of Quality Research in Chinese Medicine, Institute of Chinese Medical Sciences, University of Macau, Macau 999078, China

<sup>b</sup>UltraSpec Lab, Victoria, BC V8P 2N1, Canada

E-mail: [rwang@um.edu.mo](mailto:rwang@um.edu.mo) and [qwzhang@um.edu.mo](mailto:qwzhang@um.edu.mo)

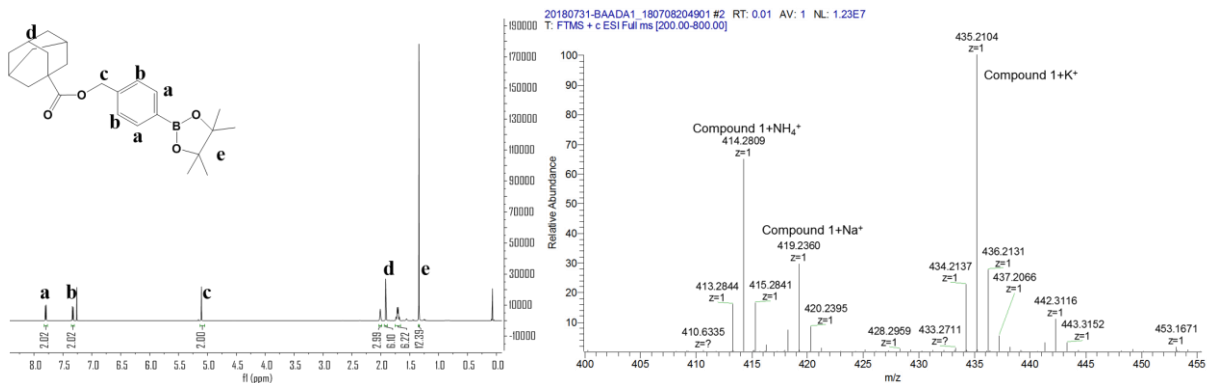

Figure S1.  $^1\text{H}$  NMR and mass spectrum of compound 1.

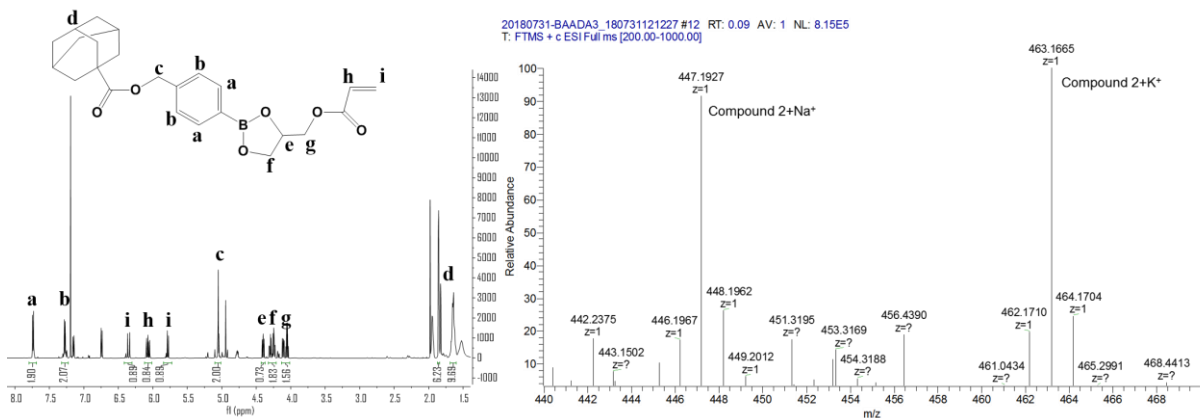

Figure S2.  $^1\text{H}$  NMR and mass spectrum of compound 2.

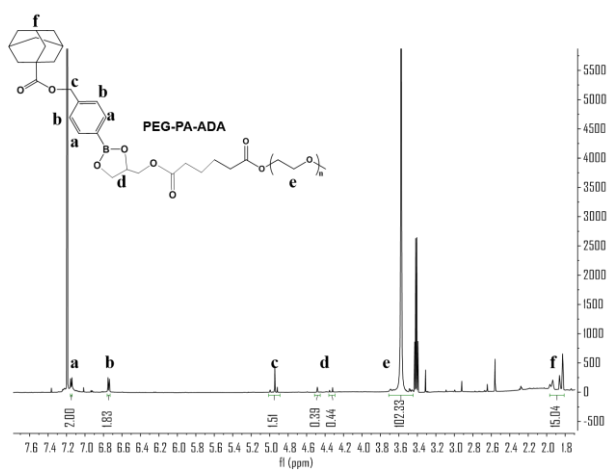

Figure S3.  $^1\text{H}$  NMR spectrum of PEG-PA-ADA.

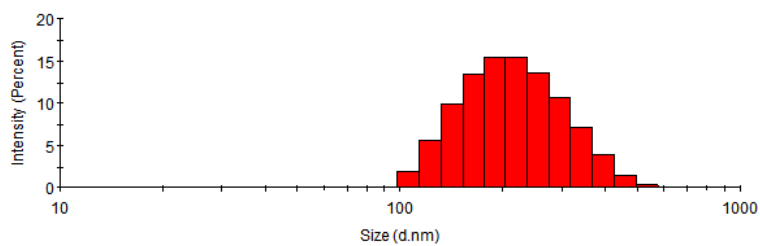

**Figure S4.** DLS of PPA-CS NPs.

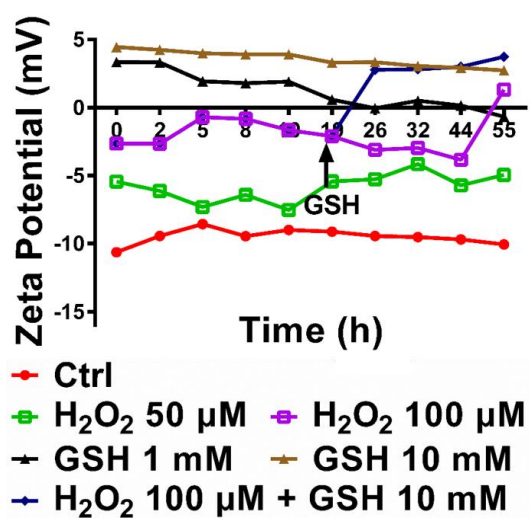

**Figure S5.** Time-evolved zeta potential of PPA-CS NPs treated with various H<sub>2</sub>O<sub>2</sub> and GSH conditions.

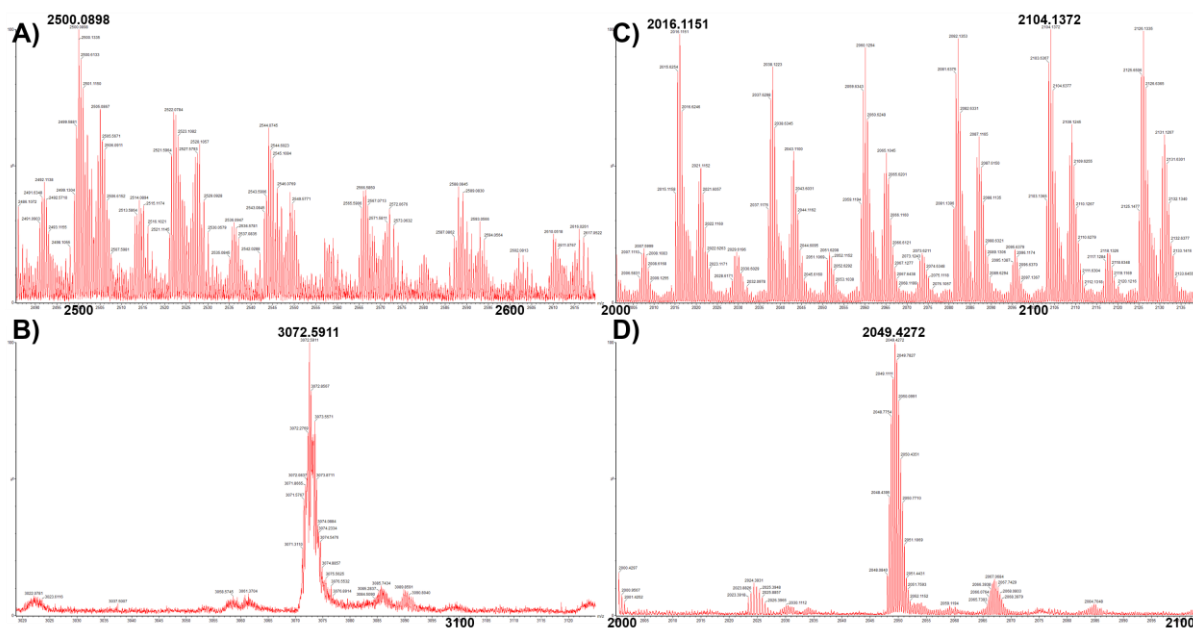

**Figure S6.** Mass spectra of (A) PPA, (B) SSPLA, (C) PPA after reaction with ROS, and (D) SSPLA after reaction with GSH.

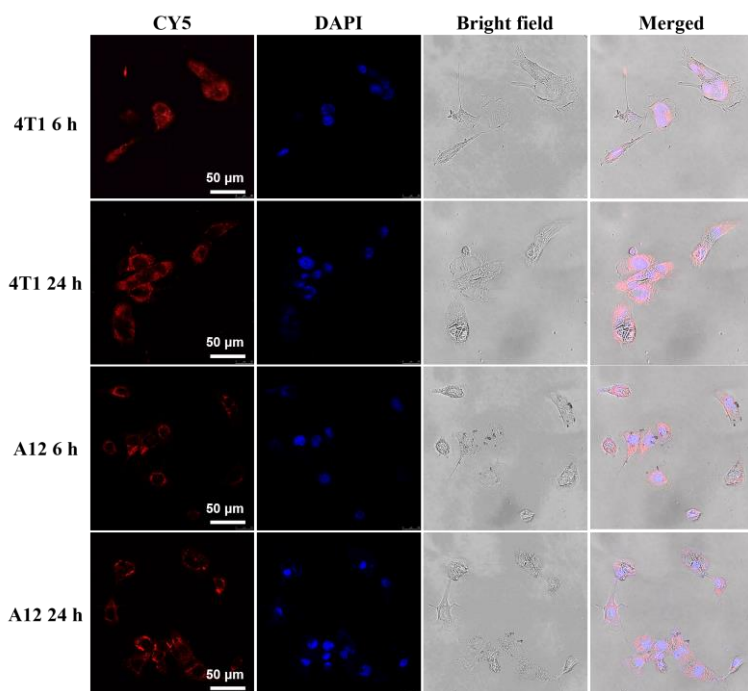

**Figure S7.** Intracellular uptake and location of CY5@PPA-CS NPs in A12 cells and 4T1 cells, after incubation for 6 and 24 h, respectively, determined by CLSM.

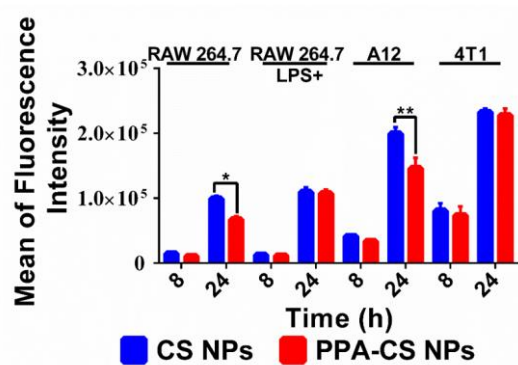

**Figure S8.** Responsive release of NR@CS NPs and NR@PPA-CS NPs in various cell lines (RAW 264.7, RAW 264.7 LPS+, A12, and 4T1 cells) for different durations (8 and 24 h), respectively, determined by flow cytometry. Unpaired t-test analysis was used for statistical analysis (\* $P < 0.05$ ; \*\* $P < 0.01$ ).

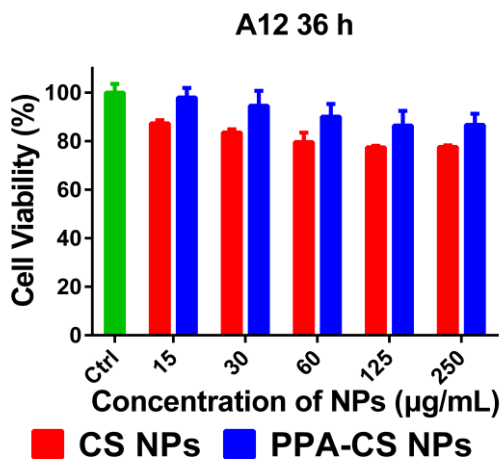

**Figure S9.** Cytotoxicity of CS NPs and PPA-CS NPs against A12 cells after incubation for 36 h.

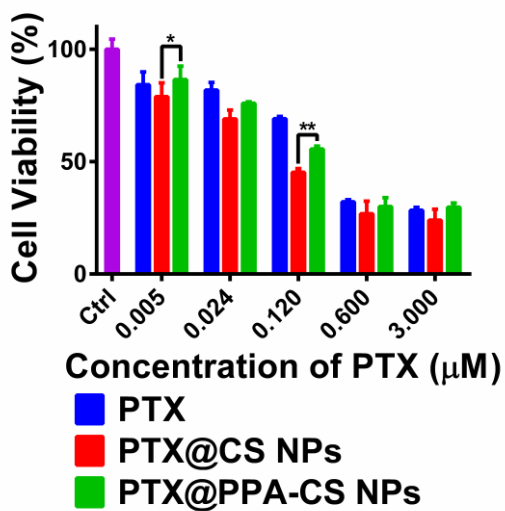

**Figure S10.** Cytotoxicity of PTX, PTX@CS NPs and PTX@PPA-CS NPs against RAW 264.7 cells for 36 h, respectively. Unpaired t-test analysis was used for statistical analysis (\*P < 0.05; \*\*P < 0.01).

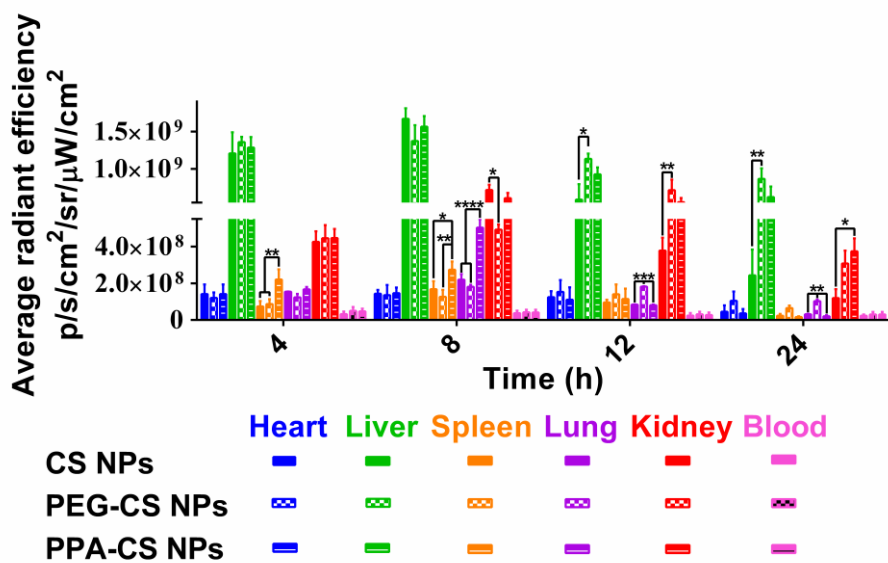

**Figure S11.** *In vivo* pharmacokinetic performance of Cy7.5@CS NPs, Cy7.5@PEG-CS NPs, and Cy7.5@PPA-CS NPs after *i.v.* injection in mice. The quantified data of fluorescence intensities of various organs and whole blood. (\*P < 0.05; \*\*P < 0.01; \*\*\*\*P < 0.0001).
